# Supplementary material for: Stochasticity of Intranuclear Biochemical Reaction Processes Controls the Final Decision of Cell Fate Associated with DNA Damage
Source: PubMed Central journal article supplement (PMC4086823; doi:10.1371/journal.pone.0101333), 2014-07-08
Supplement: pone.0101333.s004.pdf [file pone.0101333.s004.pdf]

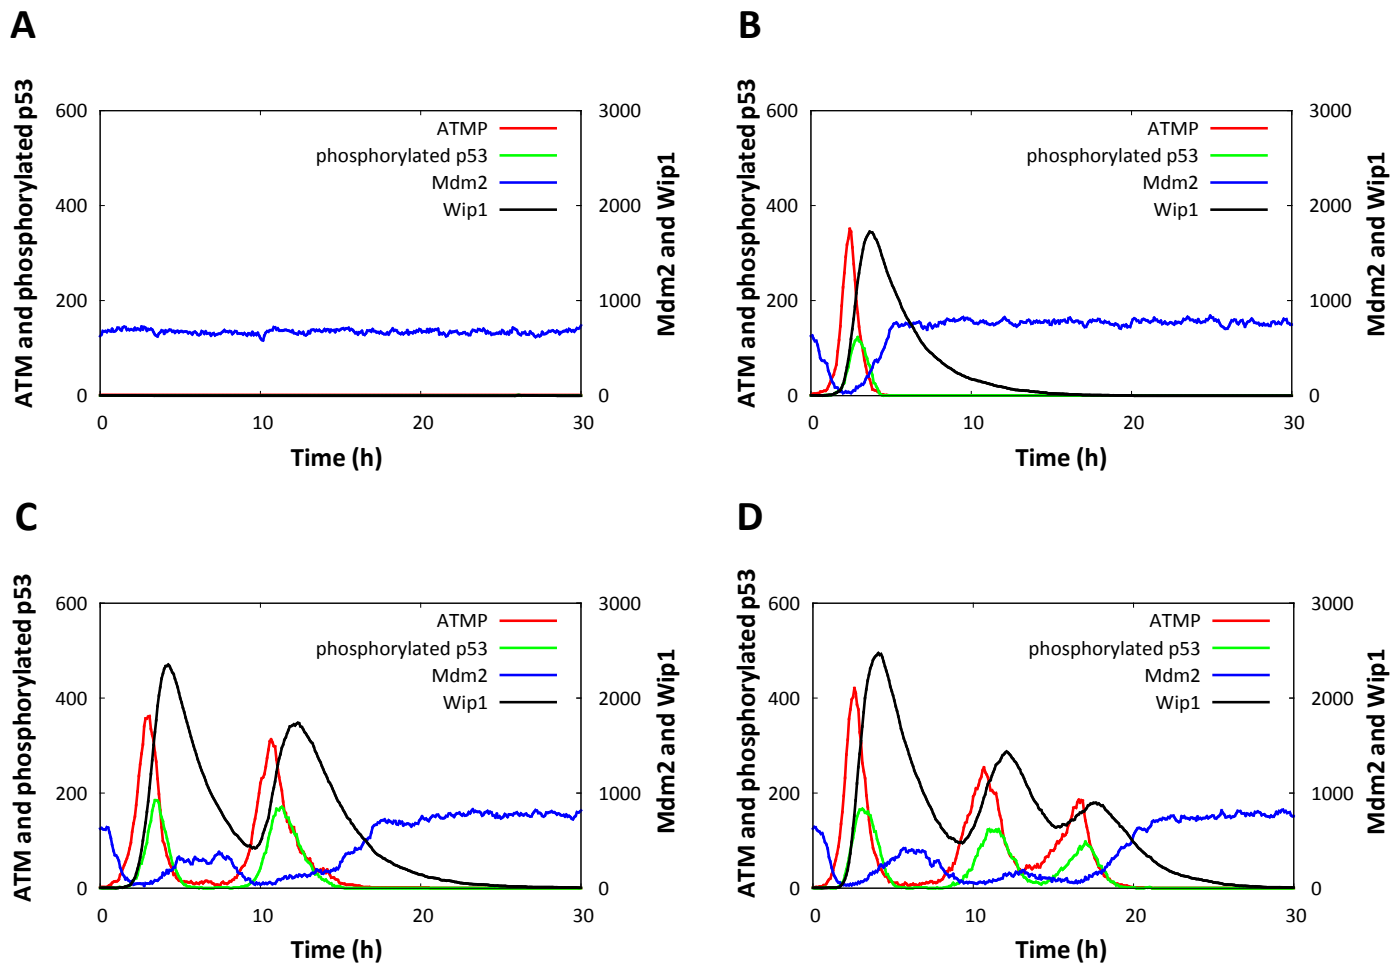

Figure S4 Simulated results of nuclear species following an IR-dose of 0.3 Gy at 0 hour.

Time courses of phosphorylated p53, Mdm2, ATM-P and Wip1 in four individual cells with No (A), one (B), two (C) and three p53 pulses (D) were shown. Respective species represents the summation of complexes including the species.
