# Supplementary material for: Stochasticity of Intranuclear Biochemical Reaction Processes Controls the Final Decision of Cell Fate Associated with DNA Damage
Source: PubMed Central journal article supplement (PMC4086823; doi:10.1371/journal.pone.0101333), 2014-07-08
Supplement: pone.0101333.s007.pdf [file pone.0101333.s007.pdf]

Table S1 Kinetic parameters in the proposed model

| Kinetic parameter | Value    | Description                                       | References         |
|-------------------|----------|---------------------------------------------------|--------------------|
| s1                | 7.83E-01 | Rate of p53 synthesis                             | 393AA, 98.25sec *1 |
| s2                | 6.60E-03 | Rate of Wip1 synthesis by p53-P                   | 605AA, 151sec *1   |
| s3                | 8.10E-03 | Rate of Mdm2 synthesis by p53-P and p53-PP        | 491AA, 122sec *1   |
| s3d               | 6.34E-01 | Basal rate of Mdm2 synthesis                      | Estimated          |
| s4                | 1.02E-1  | Basal rate of ATM synthesis                       | 3066AA, 766sec *1  |
| s5                | 1.67E-02 | Rate of p53DINP1 by p53-P and p53-PP              |                    |
| s6                | 5.91E-03 | Rate of PKC $\delta$ activation by p53-P          |                    |
| s7                | 1.31     | Basal rate of Bcl-2 mRNA synthesis                |                    |
| s7d               | 1.67E-02 | Inhibition rate of Bcl-2 mRNA synthesis by p53-PP |                    |
| s8                | 1.43     | Basal rate of Bax mRNA synthesis                  |                    |
| s8d               | 1.83E-02 | Rate of Bax mRNA synthesis by p53-PP              |                    |
| s9                | 4.37E-03 | Rate of PIDD mRNA by p53-PP                       |                    |
| s10               | 2.44E-02 | Rate of p21 mRNA by p53-P                         |                    |
| d2                | 1.30E-04 | Degradation rate of Wip1                          |                    |
| d3                | 8.30E-04 | Degradation rate of Mdm2                          |                    |
| d4                | 1.00E-04 | Degradation rate of ATM                           |                    |
| d5                | 2.00E-02 | Degradation rate of p53DINP1                      |                    |
| d6                | 1.00E-05 | Degradation rate of PKC $\delta$                  |                    |
| f0                | 1.28E-6  | Binding rate of ATM-P and Wip1                    |                    |
| r0                | 1        | Dissociation rate of ATM-P and Wip1               | Estimated          |
| k0                | 1.6      | Dephosphorylation rate of ATM-P by Wip1           |                    |
| f1                | 1.28E-06 | Binding rate of ATM-P and p53                     |                    |
| r1                | 1.00E-02 | Dissociation rate of ATM-P and p53                |                    |
| k1                | 1.00E-03 | Phosphorylation rate of p53 by ATM-P              |                    |
| f2                | 1.20E-04 | Binding rate of p53 and Mdm2                      |                    |
| r2                | 2.06     | Dissociation rate of p53 and Mdm2                 |                    |
| k2                | 1.00E-01 | Ubiquitination rate of p53 by Mdm2                |                    |
| f2p               | 9.83E-05 | Binding rate of p53-P and Mdm2                    |                    |
| r2p               | 2        | Dissociation rate of p53-P and Mdm2               |                    |
| k2p               | 1.00E-01 | Ubiquitination rate of p53-P by Mdm2              |                    |
| f3                | 1.28E-04 | Binding rate of ATM-P and Mdm2                    |                    |
| r3                | 1.00E-01 | Dissociation rate of ATM-P and Mdm2               |                    |
| k3                | 1.00E-01 | Phosphorylation rate of Mdm2 by ATM-P             |                    |
| f4                | 1.28E-06 | Binding rate of ATM and ATM-P                     |                    |
| r4                | 1.01     | Dissociation rate of ATM and ATM-P                |                    |

|         |          |                                              |                  |
|---------|----------|----------------------------------------------|------------------|
| k4      | 1.01     | Phosphorylation rate of ATM by ATM-P         |                  |
| f6      | 9.83E-05 | Binding rate of p53-PP and Mdm2              | Estimated        |
| r6      | 2        | Dissociation rate of p53-PP and Mdm2         |                  |
| k6      | 1.00E-01 | Ubiquitination rate of p53-P by Mdm2         |                  |
| kmt     | 4.16E-03 | Transport rate from nucleus to cytoplasm     | [2]              |
| s_bind  | 1.32E-01 | Binding rate of s_DSB and MRN complex        |                  |
| s_dis   | 3.24E-02 | Dissociation rate of s_DSB and MRN complex   |                  |
| s_rep   | 2.04E-03 | Repair rate of s_DSB                         | [3]              |
| c_bind  | 3.30E-03 | Binding rate of c_DSB and MRN                |                  |
| c_dis   | 8.10E-04 | Dissociation rate of c_DSB and MRN complex   |                  |
| c_rep   | 5.10E-05 | Repair rate of c_DSB                         |                  |
| s_pro2  | 8.85E-03 | Basal rate of procaspase-2 synthesis         | 452AA, 113sec *1 |
| s_bid   | 2.05E-02 | Basal rate of Bid synthesis                  | 195AA, 48sec *1  |
| s_bax   | 1.83E-2  | Rate of Bax synthesis                        | 218AA, 54sec *1  |
| s_bcl   | 1.67E-2  | Rate of Bcl-2 synthesis                      | 239AA, 59sec *1  |
| s_pidd  | 4.37E-3  | Rate of PIDD synthesis                       | 915AA, 228sec *1 |
| s_p21   | 2.44E-2  | Rate of p21 synthesis                        | 164AA, 41sec *1  |
| d_pro2  | 3.00E-04 | Degradation rate of Proc-2 and Casp-2        | Estimated        |
| d_bax   | 1.20E-02 | Degradation rate of Bax                      |                  |
| d_bcl   | 2.44E-04 | Degradation rate of Bcl-2                    | [4]              |
| d_bid   | 8.20E-04 | Degradation rate of Bid                      |                  |
| d_pidd  | 1.00E-03 | Degradation rate of PIDD                     | Estimated        |
| d_p21   | 1.00E-04 | Degradation rate of p21                      | Estimated        |
| d_mbax  | 9.92E-5  | Degradation rate of Bax mRNA                 | Estimated        |
| d_mbcl  | 6.17E-4  | Degradation rate of Bcl-2 mRNA               | *2               |
| d_mp21  | 5.56E-4  | Degradation rate of p21 mRNA                 | *2               |
| d_mpidd | 7.00E-4  | Degradation rate of PIDD mRNA                | Estimated        |
| k1f     | 2.00E-04 | Binding rate of Bax and tBid                 |                  |
| k1r     | 2.00E-02 | Dissociation rate of Bax and tBid            |                  |
| k1c     | 5.00E-03 | Transport rate of Bax/tBid into mitochondria |                  |
| k4f     | 7.00E-03 | Binding rate of SMAC and XIAP                |                  |
| k4r     | 2.21E-03 | Dissociation rate of SMAC and XIAP           |                  |
| k5f     | 2.78E-07 | Binding rate of Cytc, Apaf-1 and ATP         | [4]              |
| k5r     | 5.70E-03 | Dissociation rate of Cytc, Apaf-1 and ATP    |                  |
| k6f     | 2.84E-04 | Binding rate of apoptosome and Proc-9        |                  |
| k6r     | 7.49E-02 | Dissociation rate of apoptosome and Proc-9   |                  |
| k7f     | 4.41E-04 | Binding rate of apoptosome and Proc-9        |                  |
| k7r     | 1.00E-01 | Dissociation rate of apoptosome and Proc-9   |                  |

|      |          |                                                                       |           |
|------|----------|-----------------------------------------------------------------------|-----------|
| k8   | 7.00E-01 | Cleaving rate of Proc-9 by apoptosome                                 |           |
| k9f  | 1.96E-05 | Binding rate of Casp-9 and Proc-3                                     |           |
| k9r  | 5.71E-02 | Dissociation rate of Casp-9 and Proc-3                                |           |
| k10  | 4.8      | Cleaving rate of Proc-3 by Casp-9                                     |           |
| k11f | 1.06E-04 | Binding rate of Proc-9 and XIAP                                       |           |
| k11r | 1.00E-03 | Dissociation rate of Proc-9 and XIAP                                  | [4]       |
| k12f | 2.50E-03 | Binding rate of Casp-3 and XIAP                                       |           |
| k12r | 2.40E-03 | Dissociation rate of Casp-3 and XIAP                                  |           |
| k13f | 2.00E-03 | Binding rate of Bax and Bcl-2                                         |           |
| k13r | 2.00E-02 | Dissociation rate of Bax and Bcl-2                                    |           |
| k14f | 5.00E-04 | Binding rate of PIDD and Proc-2                                       | Estimated |
| k14r | 2.00E-01 | Dissociation rate of PIDD and Proc-2                                  | Estimated |
| k15  | 1.00E-01 | Activation rate of Proc-2 by PIDD                                     | Estimated |
| k16f | 5.00E-03 | Binding rate of Bid and Casp-2                                        |           |
| k16r | 5.00E-03 | Dissociation rate of Bid and Casp-2                                   | [5] *3    |
| k17  | 1.00E-01 | Cleaving rate of Bid by Casp-2                                        |           |
| k18f | 6.00E-04 | Binding rate of p21 and Proc-3 or Casp-3                              | Estimated |
| k18r | 1.00E-03 | Dissociation rate of p21 and Proc-3 or Casp-3                         | Estimated |
| k19  | 1        | Cleaving rate of p21 by Casp-3                                        | Estimated |
| mf1  | 1.20E-03 | Binding rate of SMAC or Cytc and mitochondrial pore                   |           |
| mr1  | 1.00E-02 | Dissociation rate of SMAC or Cytc and mitochondrial pore              |           |
| mk1  | 1.00E-03 | Release rate of SMAC and Cytc                                         | [5]       |
| mk2  | 1.00E-03 | Transport rate of SMAC and Cytc<br>between mitochondria and cytoplasm |           |
| mf3  | 1.00E-03 | Penetration rate of mitochondrial membrane by Bax                     | Estimated |
| mJ3  | 5        |                                                                       | Estimated |
| mr3  | 20       | Recovery rate of mitochondrial membrane                               | Estimated |

\*1 We assumed the synthesis rate based on the translation rate of four amino acids per second [1].

\*2 We assumed the degradation rate based on the half-life of each mRNA [2].

\*3 We assumed that the binding/dissociation/ cleaving rates of Bid and Casp-2 was as same as those of Bid and Casp-8.

#### Reference:

- [1] Audibert, A, Weil, D, Dautry, F. (2002) In Vivo Kinetics of mRNA Splicing and Transport in Mammalian Cells. *Mol. Cell Biol* 22(19): 6706-6718.
- [2] Kren, BT, Steer, CJ, (1996) Posttranscriptional regulation of gene expression in liver regeneration: role of mRNA stability. *EMBO J* 10:819-828.

- [3] Ma L, et al. (2005) A plausible model for the digital response of p53 to DNA damage. *Proc Natl Acad Sci USA* 102: 14266–14271.
- [4] Hua F, Cornejo MG, Cardone MH, Stokes CL, Lauffenburger DA (2005) Effects of Bcl-2 levels on Fas signaling-induced caspase-3 activation: molecular genetic tests of computational model predictions. *J Immunol* 175(2): 985-995.
- [5] Albeck JG, Burke JM, Spencer SL, Lauffenburger DA, Sorger PK (2008) Modeling a snap-action, variable-delay switch controlling extrinsic cell death. *PLoS Biol* 6: e299.
