# Supplementary material for: Stochasticity of Intranuclear Biochemical Reaction Processes Controls the Final Decision of Cell Fate Associated with DNA Damage
Source: PubMed Central journal article supplement (PMC4086823; doi:10.1371/journal.pone.0101333), 2014-07-08
Supplement: pone.0101333.s008.pdf [file pone.0101333.s008.pdf]

Table S2 Initial conditions for each nuclear species

| Species             | Value (N) | Description                                                      |
|---------------------|-----------|------------------------------------------------------------------|
| ATM                 | 1017      | Inactive ataxia telangiectasia mutated.                          |
| ATM:ATM-P           | 0         | Complex of ATM with ATM-P                                        |
| ATM-P               | 1         | Active ATM                                                       |
| ATM-P:Wip1          | 0         | Complex of ATM-P with Wip1                                       |
| cBax_mRNA           | *1        | Bax mRNA in cytoplasm                                            |
| nBax_mRNA           | 35        | Bax mRNA in nucleus                                              |
| cBcl-2_mRNA         | *1        | Bcl-2 mRNA in cytoplasm                                          |
| nBcl-2_mRNA         | 300       | Bcl-2 mRNA in nucleus                                            |
| Mdm2                | 626       | Murine double minute 2                                           |
| Mdm2:ATM-P          | 0         | Complex of Mdm2 with ATM-P                                       |
| MRN                 | 40        | Mre11-Rad50-Nbs1 complex                                         |
| cp21_mRNA           | *1        | p21 mRNA in cytoplasm                                            |
| np21_mRNA           | 0         | p21 mRNA in nucleus                                              |
| p53                 | 235       | Inactive p53                                                     |
| p53:ATM-P           | 0         | Complex of p53 with ATM-P                                        |
| p53:Mdm2            | 0         | Complex of p53 with Mdm2                                         |
| p53DINP1            | 0         | p53-dependent damage-inducible nuclear protein 1                 |
| p53-P               | 0         | Active p53 whose Ser15 was phosphorylated                        |
| p53-P:Mdm2          | 0         | Complex of p53-P with Mdm2                                       |
| p53-PP              | 0         | Active p53 whose Ser15 and Ser46 were phosphorylated             |
| p53-PP:Mdm2         | 0         | Complex of p53-PP with Mdm2                                      |
| cPIDD_mRNA          | *1        | p53-induced protein with a death domain (PIDD) mRNA in cytoplasm |
| nPIDD_mRNA          | 0         | PIDD mRNA in nucleus                                             |
| PKC $\delta$        | 0         | Protein kinase C $\delta$                                        |
| PKC $\delta$ :p53-P | 0         | Complex of PKC $\delta$ with p53-P                               |
| Wip1                | 4         | Wild-type p53-induced phosphatase 1                              |

\*1 Calculated using the concentration of cytoplasmic species (see conversion of concentration into the number of molecules)
