# Supplementary material for: Stochasticity of Intranuclear Biochemical Reaction Processes Controls the Final Decision of Cell Fate Associated with DNA Damage
Source: PubMed Central journal article supplement (PMC4086823; doi:10.1371/journal.pone.0101333), 2014-07-08
Supplement: pone.0101333.s009.pdf [file pone.0101333.s009.pdf]

Table S3 Biochemical reactions in the nucleus

| No. | Propensity function   | Reaction                                               |
|-----|-----------------------|--------------------------------------------------------|
| 1   | s1                    | p53 synthesis                                          |
| 2   | s2*p53-P              | Wip1 synthesis induced by p53-P                        |
| 3   | s3*(p53-P+p53-PP)     | Mdm2 synthesis induced by p53-P and p53-PP             |
| 4   | s3d                   | Mdm2 synthesis                                         |
| 5   | s4                    | ATM synthesis                                          |
| 6   | s5*(p53-P+p53-PP)     | p53DINP1 synthesis induced by p53-P and p53-PP         |
| 7   | s6*p53DINP1           | PKC $\delta$ synthesis induced by p53DINP1             |
| 8   | s7                    | Bcl-2_mRNA synthesis                                   |
| 9   | s7d*p53-PP            | Inhibition of Bcl-2_mRNA synthesis by p53-PP           |
| 10  | s8                    | Bax_mRNA synthesis                                     |
| 11  | s8d*p53-PP            | Bax_mRNA synthesis induced by p53-PP                   |
| 12  | s9*p53-PP             | PIDD_mRNA synthesis induced by p53-PP                  |
| 13  | s10*p53-P             | p21_mRNA synthesis induced by p53-P                    |
| 14  | d2*Wip1               | Wip1 degradation                                       |
| 15  | d3*Mdm2               | Mdm2 degradation                                       |
| 16  | d4*ATM                | ATM degradation                                        |
| 17  | d5*p53DINP1           | p53DINP1 degradation                                   |
| 18  | d6*PKC $\delta$       | PKC $\delta$ degradation                               |
| 19  | kmt*Bcl-2_mRNA        | Bcl-2_mRNA transport into cytoplasm                    |
| 20  | kmt*Bax_mRNA          | Bax_mRNA transport into cytoplasm                      |
| 21  | kmt*PIDD_mRNA         | PIDD_mRNA transport into cytoplasm                     |
| 22  | kmt*p21_mRNA          | p21_mRNA transport into cytoplasm                      |
| 23  | f0*ATM-P*Wip1         | ATM-P + Wip1 $\rightarrow$ ATM-P:Wip1                  |
| 24  | r0*ATM-P:Wip1         | ATM-P:Wip1 $\rightarrow$ ATM-P + Wip1                  |
| 25  | k0* ATM-P:Wip1        | ATM-P:Wip1 $\rightarrow$ deg_ATM-P + Wip1              |
| 26  | f1*ATM-P*p53          | ATM-P + p53 $\rightarrow$ ATM-P:p53                    |
| 27  | r1*ATM-P:p53          | ATM-P:p53 $\rightarrow$ ATM-P + p53                    |
| 28  | k1*ATM-P:p53          | ATM-P:p53 $\rightarrow$ ATM-P + p53-P                  |
| 29  | f1*p53-P*PKC $\delta$ | p53-P + PKC $\delta$ $\rightarrow$ p53-P:PKC $\delta$  |
| 30  | r1*p53-P:PKC $\delta$ | p53-P:PKC $\delta$ $\rightarrow$ p53-P + PKC $\delta$  |
| 31  | k1*p53-P:PKC $\delta$ | p53-P:PKC $\delta$ $\rightarrow$ p53-PP + PKC $\delta$ |
| 32  | f2*p53*Mdm2           | p53 + Mdm2 $\rightarrow$ p53:Mdm2                      |
| 33  | r2*p53:Mdm2           | p53:Mdm2 $\rightarrow$ p53 + Mdm2                      |
| 34  | k2*p53:Mdm2           | p53:Mdm2 $\rightarrow$ deg_p53 + Mdm2                  |
| 35  | f2p*p53-P*Mdm2        | p53-P + Mdm2 $\rightarrow$ p53-P:Mdm2                  |
| 36  | r2p*p53-P:Mdm2        | p53-P:Mdm2 $\rightarrow$ p53-P + Mdm2                  |
| 37  | k2p*p53-P:Mdm2        | p53-P:Mdm2 $\rightarrow$ deg_p53-P + Mdm2              |
| 38  | f3*ATM-P*Mdm2         | ATM-P + Mdm2 $\rightarrow$ ATM-P:Mdm2                  |
| 39  | r3*ATM-P:Mdm2         | ATM-P:Mdm2 $\rightarrow$ ATM-P + Mdm2                  |

---

|    |                                  |                                 |
|----|----------------------------------|---------------------------------|
| 40 | k3*ATM-P:Mdm2                    | ATM-P:Mdm2 → ATM-P + deg_Mdm2   |
| 41 | (sDSB:MRN+cDSB:MRN)*f4*ATM*ATM-P | ATM + ATM-P → ATM:ATM-P         |
| 42 | (sDSB:MRN+cDSB:MRN)*r4*ATM:ATM-P | ATM:ATM-P → ATM + ATM-P         |
| 43 | k4*ATM:ATM-P                     | ATM:ATM-P → 2ATM-P              |
| 44 | f6*p53-PP*Mdm2                   | p53-PP + Mdm2 → p53-PP:Mdm2     |
| 45 | r6*p53-PP:Mdm2                   | p53-PP:Mdm2 → p53-PP + Mdm2     |
| 46 | k6*p53-PP:Mdm2                   | p53-PP:Mdm2 → deg_p53-PP + Mdm2 |
| 47 | s_bind*MRN*sDSB                  | sDSB + MRN → sDSB:MRN           |
| 48 | s_dis*sDSB:MRN                   | sDSB:MRN → sDSB + MRN           |
| 49 | s_rep*sDSB:MRN                   | sDSB:MRN → fixed_DSB + MRN      |
| 50 | c_bind*MRN*cDSB                  | cDSB + MRN → cDSB:MRN           |
| 51 | c_dis*cDSB:MRN                   | cDSB:MRN → cDSB + MRN           |
| 52 | c_rep*cDSB:MRN                   | cDSB:MRN → fixed_DSB + MRN      |

---
