# Supplementary material for: Stochasticity of Intranuclear Biochemical Reaction Processes Controls the Final Decision of Cell Fate Associated with DNA Damage
Source: PubMed Central journal article supplement (PMC4086823; doi:10.1371/journal.pone.0101333), 2014-07-08
Supplement: pone.0101333.s010.pdf [file pone.0101333.s010.pdf]

Table S4 Initial conditions of cytoplasmic species

| Species        | Value<br>(nM) | Description                                                             |
|----------------|---------------|-------------------------------------------------------------------------|
| cBax_mRNA      | 1             | Bax mRNA in cytoplasm                                                   |
| Bax_c          | 0.6           | Bax protein in cytoplasm                                                |
| Bax_m          | 0             | Bax protein in mitochondria                                             |
| cBcl-2_mRNA    | 1.5           | Bcl-2 mRNA in cytoplasm                                                 |
| Bcl-2_c        | 26.7          | Bcl-2 protein in cytoplasm                                              |
| Bcl-2:Bax      | 0             | Complex of Bcl-2_c with Bax_c                                           |
| Bcl-2:Bax_m    | 0             | Complex of Bcl-2_c with Bax_m                                           |
| cp21_mRNA      | 0             | p21 mRNA in cytoplasm                                                   |
| p21_c          | 0             | p21 protein in cytoplasm                                                |
| PIDD_mRNA      | 0             | p53-induced protein with a death domain (PIDD) mRNA in cytoplasm        |
| PIDD_c         | 0             | PIDD protein in cytoplasm                                               |
| Proc-2         | 30            | Procaspase (Proc)-2 which is the inactive form                          |
| PIDD:Proc-2    | 0             | Complex of PIDD with Proc-2                                             |
| Casp-2         | 0             | Caspase (Casp)-2 which is the active form                               |
| Bid            | 25            | BH3 interacting domain death agonist (Bid)                              |
| Casp-2:Bid     | 0             | Complex of Casp-2 with Bid                                              |
| tBid           | 0             | Truncated Bid (tBid)                                                    |
| Bax:tBid       | 0             | Complex of Bax_c with tBid                                              |
| Bcl-2:Bax:tBid | 0             | Complex of Bcl-2_c and Bax:tBid                                         |
| M_c            | 10            | The state that there are no pores in mitochondrial outer membrane       |
| M_o            | 0             | The state that there are pores in mitochondrial outer membrane          |
| Cytc_m         | 10000         | Cytochrome <i>c</i> (Cytc) in mitochondria                              |
| Cytc_r         | 0             | Cytc released from mitochondria, but remaining in M_o                   |
| Cytc_c         | 0             | Cytc in cytoplasm                                                       |
| M_o:Cytc_m     | 0             | The state that Cytc binds to pores in mitochondrial outer membrane      |
| SMAC_m         | 100           | Second mitochondria-derived activator of caspase (SMAC) in mitochondria |
| SMAC_r         | 0             | SMAC released from mitochondria, but remaining in M_o                   |
| SMAC_c         | 0             | SMAC in cytoplasm                                                       |
| M_o:SMAC_m     | 0             | The state that SMAC binds to pores in mitochondrial outer membrane      |
| Apaf1          | 370           | Apoptotic protease-activating factor-1 (Apaf-1)                         |
| ATP            | 10            | Adenosine triphosphate (ATP)                                            |
| Apop           | 0             | Apoptosome complex containing Cytc, ATP and Apaf-1                      |
| Proc-9         | 30            | Proc-9 which is the inactive form                                       |
| Apop:Proc-9    | 0             | Complex of Apoptosome with a Proc-9                                     |
| Apop:Proc-9_2  | 0             | Complex of Apoptosome with two Proc-9                                   |

---

|               |     |                                                             |
|---------------|-----|-------------------------------------------------------------|
| Casp-9        | 0   | Casp-9 which is the active form                             |
| Proc-3        | 200 | Proc-3 which is the inactive form                           |
| Casp-9:Proc-3 | 0   | Complex of Casp-9 with Proc-3                               |
| Casp-3        | 0   | Casp-3 which is the active form                             |
| p21:Casp-3    | 0   | Complex of p21_c with Casp-3                                |
| p21:Proc-3    | 0   | Complex of p21_c with Proc-3                                |
| XIAP          | 60  | X-linked inhibitor of apoptosis protein in cytoplasm (XIAP) |
| Casp-3:XIAP   | 0   | Complex of Casp-3 with XIAP                                 |
| Proc-9:XIAP   | 0   | Complex of Proc-9 with XIAP                                 |
| SMAC_XIAP     | 0   | Complex of SMAC_c with XIAP                                 |

---
